# Supplementary material for: Effects of Mind–Body Interventions Involving Meditative Movements on Quality of Life, Depressive Symptoms, Fear of Falling and Sleep Quality in Older Adults: A Systematic Review with Meta-Analysis
Source: PubMed Central journal article supplement (PMC7559727; doi:10.3390/ijerph17186556), 2020-09-09
Supplement: ijerph-17-06556-s001.pdf [file ijerph-17-06556-s001.pdf]

## Supplementary Materials

---

### Effects of Mind–Body Interventions Involving Meditative Movements on Quality of Life, Depressive Symptoms, Fear of Falling and Sleep Quality in Older Adults: A Systematic Review with Meta-Analysis

---

M. WEBER, T. SCHNORR, M. MORAT, T. MORAT, L. DONATH

**Included elements in this document:** 2 Figures and 3 Tables

---

| Number    | Page(s) | Title                                                                                                                                                                                                                                                                                        |
|-----------|---------|----------------------------------------------------------------------------------------------------------------------------------------------------------------------------------------------------------------------------------------------------------------------------------------------|
| Figure S1 | 1       | Funnel plots for publication bias assessment on the outcome quality of life (A) and its subscales: physical functioning (B), psychological functioning (C) and social functioning (D). The middle-dashed line indicated the mean SMD. SE: standard error; SMD: standardized mean difference. |
| Figure S2 | 1       | Funnel plots for publication bias assessment on the outcomes depressive symptoms (E), fear of falling (F) and sleep quality (G). The middle-dashed line indicated the mean SMD. SE: standard error; SMD: standardized mean difference.                                                       |
| Table S1  | 2–11    | Characteristics of the included studies.                                                                                                                                                                                                                                                     |
| Table S2  | 12–17   | Questionnaires and corresponding outcomes of the included studies.                                                                                                                                                                                                                           |
| Table S3  | 18–20   | PEDro scores and sum of the included trials.                                                                                                                                                                                                                                                 |

---

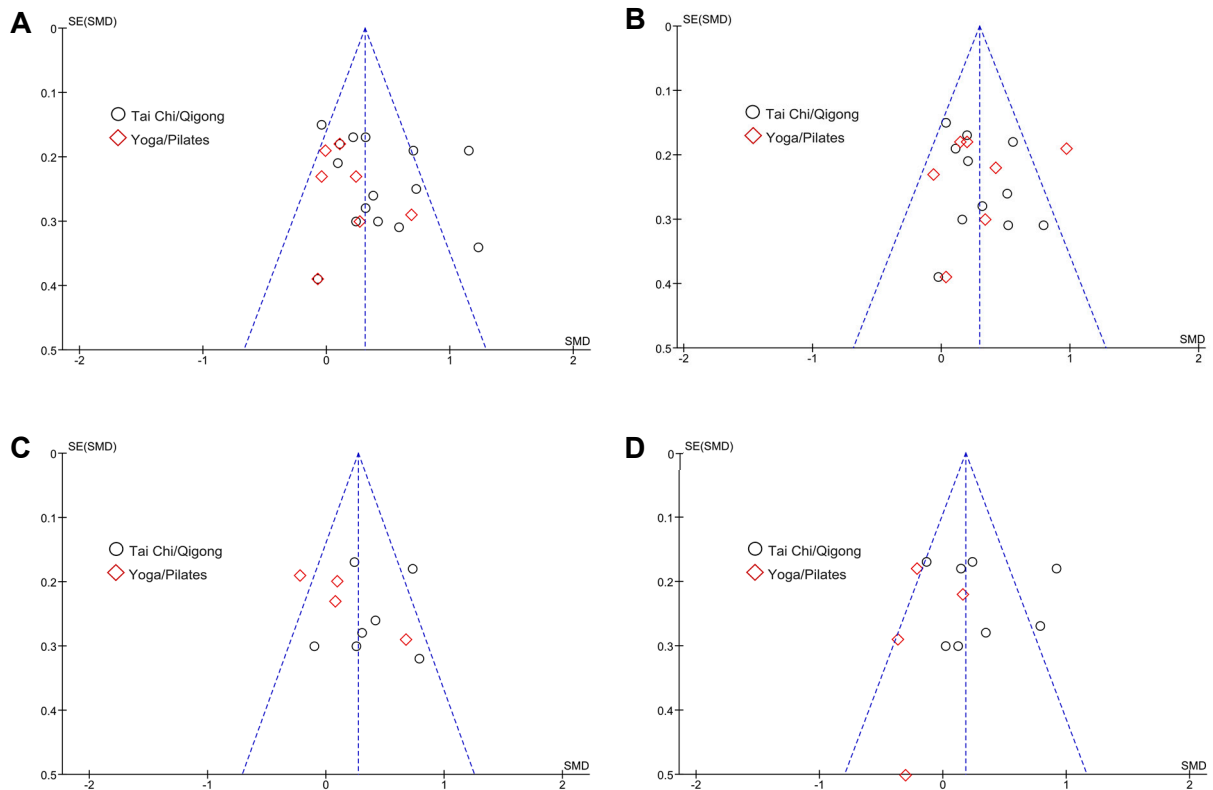

**Figure S1** Funnel plots for publication bias assessment on the outcome quality of life (A) and its subscales: physical functioning (B), psychological functioning (C) and social functioning (D). The middle-dashed line indicated the mean SMD. SE: standard error; SMD: standardized mean difference.

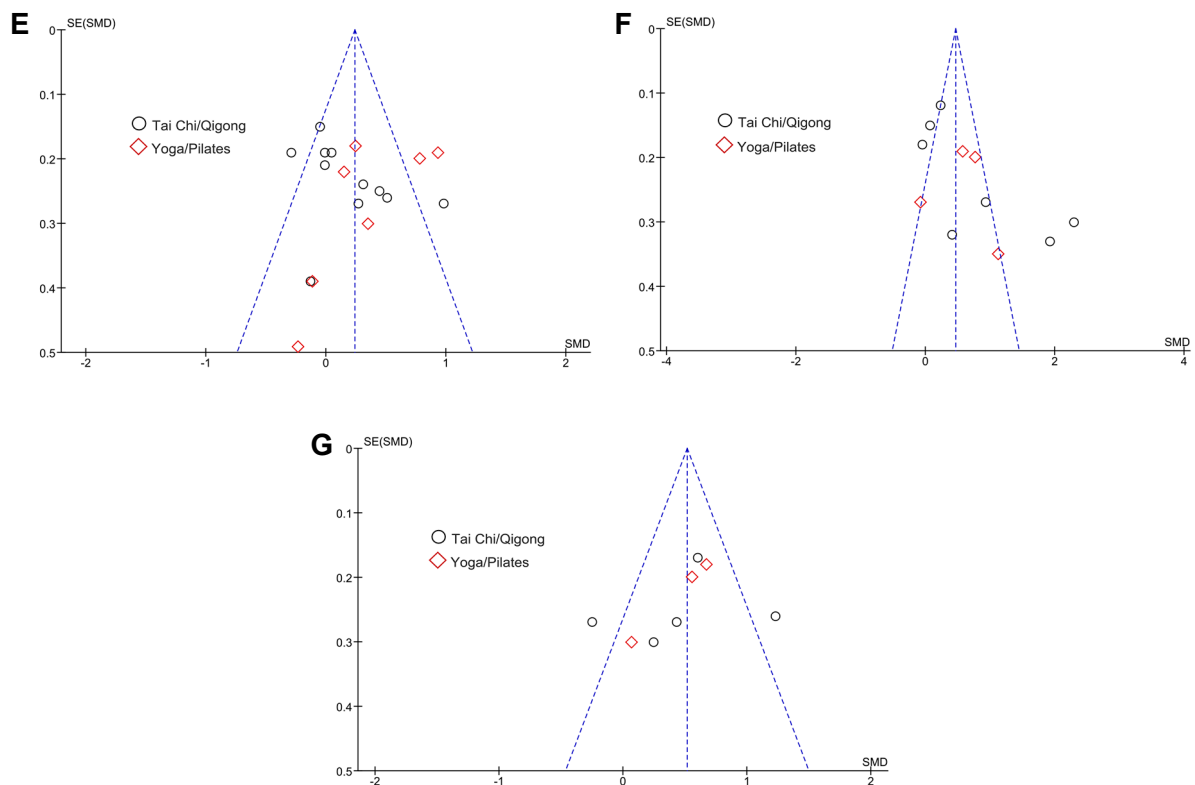

**Figure S2** Funnel plots for publication bias assessment on the outcomes depressive symptoms (E), fear of falling (F) and sleep quality (G). The middle-dashed line indicated the mean SMD. SE: standard error; SMD: standardized mean difference.

**Table S1** Characteristics of the included studies.

| Reference:<br>Publication<br>Year, Country | Study<br>Design | Sample:<br>Population,<br>Sample Size,<br>Mean Age $\pm$ SD                                                  | Groups:<br>Sample Size,<br>Mean Age $\pm$ SD                                             | Intervention                                                                                                                                                                               | Training<br>Characteristics                                                                   | Target<br>Outcome<br>Measures | PEDro<br>Score |
|--------------------------------------------|-----------------|--------------------------------------------------------------------------------------------------------------|------------------------------------------------------------------------------------------|--------------------------------------------------------------------------------------------------------------------------------------------------------------------------------------------|-----------------------------------------------------------------------------------------------|-------------------------------|----------------|
| [1]<br>2019,<br>Spain                      | Two-arm<br>RCT  | Community-dwelling<br>postmenopausal<br>women aged 60 and<br>above,<br>$n = 107$ ,<br>$68.2 \pm 8.4$ years   | IG<br>$n = 55$ ,<br>$70.0 \pm 7.8$ years<br>CG<br>$n = 52$ ,<br>$66.8 \pm 10.1$<br>years | (a) IG: Pilates (basic principles, breath-<br>ing, strengthening and stretching exer-<br>cises for main body segments)<br>(b) CG: day-to-day lifestyle, received a<br>series of guidelines | 12 weeks,<br>2 sessions/week,<br>60 min/session                                               | HADS<br>PSQI                  | 7              |
| [2]<br>2019,<br>Spain                      | Two-arm<br>RCT  | Community-dwelling<br>postmenopausal<br>women aged 60 and<br>above,<br>$n = 107$ ,<br>$68.2 \pm 8.4$ years   | IG<br>$n = 55$ ,<br>$70.0 \pm 7.8$ years<br>CG<br>$n = 52$ ,<br>$66.8 \pm 10.1$<br>years | (a) IG: Pilates (basic principles, breath-<br>ing, strengthening and stretching exer-<br>cises for main body segments)<br>(b) CG: day-to-day lifestyle, received a<br>series of guidelines | 12 weeks,<br>2 sessions/week,<br>60 min/session                                               | ABC<br>FES-I                  | 8              |
| [3]<br>2009,<br>Turkey                     | Two-arm<br>RCT  | Sedentary women<br>with senile osteopo-<br>rosis aged 65 and<br>above,<br>$n = 44$ ,<br>$70.2 \pm 5.6$ years | IG<br>$n = 22$ ,<br>$69.5 \pm 4.9$ years<br>CG<br>$n = 22$ ,<br>$71.2 \pm 6.3$ years     | (a) IG: Tai Chi<br>(b) CG: normal lifestyle                                                                                                                                                | 6 months,<br>3 sessions/week,<br>weeks 1-4:<br>30min/session<br>weeks 5-24: 60<br>min/session | NHP<br>SF-36                  | 7              |

**Table S1 Continued**

| Reference:<br>Publication<br>Year, Country | Study<br>Design           | Sample:<br>Population,<br>Sample Size,<br>Mean Age $\pm$ SD                                     | Groups:<br>Sample Size,<br>Mean Age $\pm$ SD                                                                                     | Intervention                                                                                                                       | Training<br>Characteristics                     | Target<br>Outcome<br>Measures                      | PEDro<br>Score |
|--------------------------------------------|---------------------------|-------------------------------------------------------------------------------------------------|----------------------------------------------------------------------------------------------------------------------------------|------------------------------------------------------------------------------------------------------------------------------------|-------------------------------------------------|----------------------------------------------------|----------------|
| [4]<br>2013,<br>China                      | Three-<br>arm RCT         | Chronic obstructive<br>pulmonary disease<br>(COPD) patients<br>aged 60 and above,<br>$n = 206$  | IG<br>$n = 70$ ,<br>$71.7 \pm 8.2$ years<br>CG<br>$n = 67$ ,<br>$73.6 \pm 7.4$ years<br>BW<br>$n = 69$ ,<br>$73.6 \pm 7.5$ years | (a) IG: Tai Chi Qigong<br><br>(b) CG: usual care<br><br>(c) BW: breathing and walking exer-<br>cise, not included in meta-analysis | 3 months,<br>2 sessions/week,<br>60 min/session | SGRQ<br>MSPSS                                      | 6              |
| [5]<br>2017,<br>China                      | Two-arm<br>RCT            | "Hidden" (isolated)<br>elderly aged 60 and<br>above,<br>$n = 46$ ,<br>$77.3 \pm 7.4$ years      | IG<br>$n = 24$ ,<br>$75.4 \pm 5.9$ years<br>CG<br>$n = 22$ ,<br>$79.4 \pm 8.5$ years                                             | (a) IG: Tai Chi Qigong (18 forms)<br><br>(b) CG: routine activities                                                                | 3 months,<br>2 sessions/week,<br>60 min/session | SF-12<br>MHI-18<br>LSNS-6<br>DJGLS<br>RSSQ<br>RSES | 6              |
| [6]<br>2009,<br>China                      | Two-arm<br>cluster<br>RCT | Community-dwelling<br>older adults aged 60<br>and above,<br>$n = 128$ ,<br>$69.2 \pm 6.2$ years | IG<br>$n = 62$ ,<br>$65.8 \pm 4.3$ years<br>CG<br>$n = 66$ ,<br>$72.4 \pm 6.0$ years                                             | (a) IG: silver Yoga<br><br>(b) CG: wait-list control group                                                                         | 6 months,<br>3 sessions/week,<br>70 min/session | SF-12<br>TDQ<br>PSQI                               | 5              |
| [7]<br>2010,<br>USA                        | Two-arm<br>RCT            | Postmenopausal<br>women with osteo-<br>penia aged 65 and<br>above,<br>$n = 53$                  | IG<br>$n = 26$ ,<br>$72.4 \pm 6.2$ years<br>CG<br>$n = 27$ ,<br>$71.3 \pm 6.0$ years                                             | (a) IG: Tai Chi (simplified 24-form<br>Yang-style)<br><br>(b) CG: no treatment                                                     | 24 weeks,<br>3 sessions/week,<br>60 min/session | SF-36                                              | 6              |

**Table S1 Continued**

| Reference:<br>Publication<br>Year, Country | Study<br>Design           | Sample:<br>Population,<br>Sample Size,<br>Mean Age $\pm$ SD                                                                                            | Groups:<br>Sample Size,<br>Mean Age $\pm$ SD | Intervention                                                                                 | Training<br>Characteristics                                                      | Target<br>Outcome<br>Measures | PEDro<br>Score |
|--------------------------------------------|---------------------------|--------------------------------------------------------------------------------------------------------------------------------------------------------|----------------------------------------------|----------------------------------------------------------------------------------------------|----------------------------------------------------------------------------------|-------------------------------|----------------|
| [8]<br>2013,<br>Korea                      | Three-<br>arm RCT         | Single women with<br>backache aged 65<br>and above,<br>$n = 102$ ,<br>68.5 years                                                                       | YJJ<br>$n = 32$                              | (a) YJJ: Yi Jin Jing (health Qigong), 12<br>routines                                         | 12 weeks,<br>3 sessions/week,<br>60 min/session                                  | GDS-SF                        | 5              |
|                                            |                           |                                                                                                                                                        | LZJ<br>$n = 36$                              | (b) LZJ: Liu Zi Jue (health Qigong), 6<br>routines                                           |                                                                                  |                               |                |
|                                            |                           |                                                                                                                                                        | CG<br>$n = 34$                               | (c) CG: no treatment                                                                         |                                                                                  |                               |                |
| [9]<br>2017,<br>Iran                       | Two-arm<br>RCT            | Residents of elderly<br>home aged 60 and<br>above,<br>$n = 56$                                                                                         | IG<br>$n = 27$ ,<br>69.2 $\pm$ 5.5 years     | (a) IG: Tai Chi (10 steps)                                                                   | 12 weeks,<br>3 sessions/week,<br>5-25 min/session<br>(progressive dura-<br>tion) | BDI-II                        | 5              |
|                                            |                           |                                                                                                                                                        | CG<br>$n = 29$ ,<br>69.3 $\pm$ 5.0 years     | (b) CG: activities of daily living (ADL)                                                     |                                                                                  |                               |                |
| [10]<br>2020,<br>China +<br>Canada         | Two-arm<br>cluster<br>RCT | Adults with sleep dis-<br>turbances aged 60<br>and above,<br>$n = 139$ ,<br>71.1 $\pm$ 6.3 years                                                       | IG<br>$n = 67$ ,<br>70.3 $\pm$ 5.7 years     | (a) IG: Baduanjin (Qigong)                                                                   | 24 weeks,<br>5 sessions/week,<br>45 min/session                                  | SF-36<br>PSQI                 | 6              |
|                                            |                           |                                                                                                                                                        | CG<br>$n = 72$ ,<br>71.8 $\pm$ 6.7 years     | (b) CG: wait-list control group                                                              |                                                                                  |                               |                |
| [11]<br>2007,<br>Australia                 | Three-<br>arm<br>RCT      | Community-dwelling<br>adults with sympto-<br>matic hip or knee os-<br>teoarthritis aged be-<br>tween 59 and 85,<br>$n = 152$ ,<br>71.1 $\pm$ 6.3 years | IG<br>$n = 56$ ,<br>70.8 $\pm$ 6.3 years     | (a) IG: Tai Chi for arthritis (modification<br>of 24 forms from the Sun style of Tai<br>Chi) | 12 weeks,<br>2 sessions/week,<br>60 min/session                                  | SF-12<br>DASS21               | 8              |
|                                            |                           |                                                                                                                                                        | CG<br>$n = 41$ ,<br>69.6 $\pm$ 6.1 years     | (b) CG: wait-list control group                                                              |                                                                                  |                               |                |
|                                            |                           |                                                                                                                                                        | HT<br>$n = 55$ ,<br>70.0 $\pm$ 6.3 years     | (c) HT: hydrotherapy, not included in<br>meta-analysis                                       |                                                                                  |                               |                |

**Table S1 Continued**

| Reference:<br>Publication<br>Year, Country | Study<br>Design | Sample:<br>Population,<br>Sample Size,<br>Mean Age $\pm$ SD                                                                                     | Groups:<br>Sample Size,<br>Mean Age $\pm$ SD                                         | Intervention                                                                                                                             | Training<br>Characteristics                                                      | Target<br>Outcome<br>Measures | PEDro<br>Score |
|--------------------------------------------|-----------------|-------------------------------------------------------------------------------------------------------------------------------------------------|--------------------------------------------------------------------------------------|------------------------------------------------------------------------------------------------------------------------------------------|----------------------------------------------------------------------------------|-------------------------------|----------------|
| [12]<br>2016,<br>Israel                    | Two-arm<br>RCT  | Community-dwelling<br>older adults aged 65<br>and above,<br>$n = 78$ ,<br>$71.15 \pm 4.3$ years                                                 | IG<br>$n = 34$ ,<br>$70.3 \pm 3.8$ years<br>CG<br>$n = 44$ ,<br>$72.1 \pm 4.6$ years | (a) IG: Pilates (balance control, pos-<br>tural control, strength, 3 levels; Thera-<br>Band + Swiss balls)<br>(b) CG: no treatment       | 3 months,<br>3 sessions/week,<br>60 min/session                                  | SF-36                         | 7              |
| [13]<br>2009,<br>USA                       | Two-arm<br>RCT  | Older adults aged 60<br>and above with ky-<br>phosis angle $\geq 40^\circ$<br>(noticed after age<br>50),<br>$n = 118$ ,<br>$75.5 \pm 7.4$ years | IG<br>$n = 58$ ,<br>$74.5 \pm 7.6$ years<br>CG<br>$n = 60$ ,<br>$76.5 \pm 7.2$ years | (a) IG: Hatha Yoga [ <i>asanas</i> (poses)<br>and <i>pranas</i> (breathing)]<br>(b) CG: monthly lunch/seminars<br>(2 hours per session)  | 24 weeks,<br>3 sessions/week,<br>60 min/session                                  | SF-36<br>ABC                  | 8              |
| [14]<br>2018,<br>USA                       | Two-arm<br>RCT  | Inactive adults at risk<br>for further mobility<br>disability aged be-<br>tween 60 and 89,<br>$n = 45$                                          | IG<br>$n = 22$ ,<br>$71.6 \pm 8.3$ years<br>HE<br>$n = 23$ ,<br>$76.0 \pm 7.8$ years | (a) IG: silver age Yoga (program based<br>on principles of Iyengar Yoga)<br>(b) HE: health education (weekly infor-<br>mation workshops) | 10 weeks,<br>2 sessions/week,<br>60 min/session                                  | SF-36<br>CES-D<br>PSQI        | 6              |
| [15]<br>2011,<br>Iran                      | Two-arm<br>RCT  | Residents of elderly<br>home aged 60 and<br>above,<br>$n = 56$                                                                                  | IG<br>$n = 29$ ,<br>$68.7 \pm 5.5$ years<br>CG<br>$n = 27$ ,<br>$69.4 \pm 5.3$ years | (a) IG: Tai Chi (10 stages)<br>(b) CG: activities of daily living (ADL)                                                                  | 12 weeks,<br>3 sessions/week,<br>5-25 min/session<br>(progressive dura-<br>tion) | PSQI                          | 5              |

**Table S1 Continued**

| Reference:<br>Publication<br>Year, Country | Study<br>Design   | Sample:<br>Population,<br>Sample Size,<br>Mean Age $\pm$ SD                                                             | Groups:<br>Sample Size,<br>Mean Age $\pm$ SD                                               | Intervention                                                                                                                                                                                                                                                           | Training<br>Characteristics                         | Target<br>Outcome<br>Measures          | PEDro<br>Score |
|--------------------------------------------|-------------------|-------------------------------------------------------------------------------------------------------------------------|--------------------------------------------------------------------------------------------|------------------------------------------------------------------------------------------------------------------------------------------------------------------------------------------------------------------------------------------------------------------------|-----------------------------------------------------|----------------------------------------|----------------|
| [16]<br>2018,<br>Iran                      | Two-arm<br>RCT    | Community-dwelling<br>adults aged 60 and<br>above,<br>$n = 60$ ,<br>estimated mean age<br>71.5 years                    | IG<br>$n = 30$<br><hr/> CG<br>$n = 30$                                                     | (a) IG: Tai Chi Chuan (Yang-style)<br><hr/> (b) CG: no treatment                                                                                                                                                                                                       | 8 weeks,<br>2 sessions/week,<br>55 min/session      | FES-I                                  | 7              |
| [17]<br>2016,<br>China +<br>Australia      | Two-arm<br>RCT    | Adults in a long-term<br>care facility using<br>wheelchairs aged 65<br>and above,<br>$n = 60$ ,<br>81.3 $\pm$ 8.1 years | IG<br>$n = 30$ ,<br>80.7 $\pm$ 9.7 years<br><hr/> CG<br>$n = 30$ ,<br>81.8 $\pm$ 6.3 years | (a) IG: STEP; simplified Tai Chi exer-<br>cise program (seated Tai Chi)<br><hr/> (b) CG: usual care activities                                                                                                                                                         | 26 weeks,<br>3 sessions/week,<br>40 min/session     | POMS-SF                                | 6              |
| [18]<br>2016,<br>China +<br>Australia      | Two-arm<br>RCT    | Adults in a long-term<br>care facility using<br>wheelchairs aged 65<br>and above,<br>$n = 60$ ,<br>81.3 $\pm$ 8.1 years | IG<br>$n = 30$ ,<br>80.7 $\pm$ 9.7 years<br><hr/> CG<br>$n = 30$ ,<br>81.8 $\pm$ 6.3 years | (a) IG: STEP; simplified Tai Chi exer-<br>cise program (seated Tai Chi)<br><hr/> (b) CG: usual care activities                                                                                                                                                         | 26 weeks,<br>3 sessions/week,<br>40 min/session     | WHOQOL-<br>BREF<br>GDS-SF              | 6              |
| [19]<br>2011,<br>China                     | Three-<br>arm RCT | Community-dwelling<br>adults aged 60 and<br>above,<br>$n = 186$ ,<br>estimated mean age<br>68.5 years                   | IG<br>$n = 62$<br><hr/> CG<br>$n = 62$<br><hr/> CB<br>$n = 62$                             | (a) IG: Tai Chi + CB (core of lessons:<br>10 positions derived from the Yang-<br>style and 8-weekly sessions of cogni-<br>tive-behavioral strategies)<br><hr/> (b) CG: no treatment<br><hr/> (c) CB: cognitive-behavioral strategies,<br>not included in meta-analysis | 8 weeks,<br>3-5<br>sessions/week,<br>60 min/session | WHOQOL-<br>BREF<br>ISSB<br>GFFM<br>FES | 8              |

**Table S1 Continued**

| Reference:<br>Publication<br>Year, Country | Study<br>Design           | Sample:<br>Population,<br>Sample Size,<br>Mean Age $\pm$ SD                                                      | Groups:<br>Sample Size,<br>Mean Age $\pm$ SD                                           | Intervention                                                                                                                                                       | Training<br>Characteristics                     | Target<br>Outcome<br>Measures | PEDro<br>Score |
|--------------------------------------------|---------------------------|------------------------------------------------------------------------------------------------------------------|----------------------------------------------------------------------------------------|--------------------------------------------------------------------------------------------------------------------------------------------------------------------|-------------------------------------------------|-------------------------------|----------------|
| [20]<br>2008,<br>USA                       | Two-arm<br>RCT            | Adults with moderate<br>sleep complaints<br>aged 59 and above,<br>$n = 112$                                      | IG<br>$n = 59$ ,<br>$69.7 \pm 6.2$ years<br>HE<br>$n = 53$ ,<br>$70.2 \pm 7.5$ years   | (a) IG: Tai Chi Chih (specific set of 20<br>exercises)<br>(b) HE: health education (16 didactic<br>presentations)                                                  | 16 weeks,<br>3 sessions/week,<br>40 min/session | BDI<br>PSQI                   | 7              |
| [21]<br>2001,<br>USA                       | Two-arm<br>RCT            | Healthy, physically<br>inactive adults aged<br>65 and above,<br>$n = 72$ ,<br>$72.8 \pm 5.1$ years               | IG<br>$n = 40$ ,<br>$72.8 \pm 4.7$ years<br>CG<br>$n = 32$ ,<br>$72.7 \pm 5.7$ years   | (a) IG: Tai Chi (classical Yang-style; 24<br>forms; strength, balance, postural<br>alignment and concentration)<br>(b) CG: wait-list control group                 | 6 months,<br>2 sessions/week,<br>60 min/session | SF-20                         | 5              |
| [22]<br>2019,<br>USA                       | Two-arm<br>cluster<br>RCT | Adults from subsi-<br>dized housing facili-<br>ties aged 60 and<br>above,<br>$n = 180$ ,<br>$75.3 \pm 8.8$ years | IG<br>$n = 93$ ,<br>$75.9 \pm 9.1$ years<br>HE<br>$n = 87$ ,<br>$74.6 \pm 8.6$ years   | (a) IG: Tai Chi (9 core movements fol-<br>lowing the traditional Cheng-Man-<br>Ch'ing's Yang-style)<br>(b) HE: health education (lecture and<br>group discussions) | 52 weeks,<br>2 sessions/week,<br>60 min/session | SF-12<br>CES-D<br>ABC         | 6              |
| [23]<br>2009,<br>The Netherlands           | Two-arm<br>RCT            | Community-dwelling<br>adults with high fall<br>risk aged 70 and<br>above,<br>$n = 269$ ,<br>$77 \pm 4.7$ years   | IG<br>$n = 138$ ,<br>$77.5 \pm 4.7$ years<br>CG<br>$n = 131$ ,<br>$76.8 \pm 4.6$ years | (a) IG: Tai Chi Chuan (10 positions<br>from Yang-style in main exercise +<br>warm-up from Chi Kung)<br>(b) CG: usual care                                          | 13 weeks,<br>2 sessions/week,<br>60 min/session | FES                           | 8              |



**Table S1 Continued**

| Reference:<br>Publication<br>Year, Country | Study<br>Design | Sample:<br>Population,<br>Sample Size,<br>Mean Age $\pm$ SD                                   | Groups:<br>Sample Size,<br>Mean Age $\pm$ SD                                         | Intervention                                                                                                                               | Training<br>Characteristics                     | Target<br>Outcome<br>Measures | PEDro<br>Score |
|--------------------------------------------|-----------------|-----------------------------------------------------------------------------------------------|--------------------------------------------------------------------------------------|--------------------------------------------------------------------------------------------------------------------------------------------|-------------------------------------------------|-------------------------------|----------------|
| [24]<br>2017,<br>China                     | Two-arm<br>RCT  | Women with knee<br>osteoarthritis aged<br>60 and above,<br>$n = 46$ ,<br>$71.1 \pm 2.7$ years | IG<br>$n = 23$ ,<br>$64.6 \pm 3.4$ years<br>HE<br>$n = 23$ ,<br>$64.5 \pm 3.4$ years | (a) IG: Tai Ji Quan (8 forms adapted<br>primarily from the 24-form practice rou-<br>tine)<br>(b) HE: bi-weekly health education<br>classes | 24 weeks,<br>3 sessions/week,<br>60 min/session | SF-36<br>PSQI                 | 7              |
| [25]<br>2018,<br>Iran                      | Two-arm<br>RCT  | Community-dwelling<br>adults aged 60 and<br>above,<br>$n = 53$                                | IG<br>$n = 27$ ,<br>$67.2 \pm 5.4$ years<br>CG<br>$n = 26$ ,<br>$68.1 \pm 5.2$ years | (a) IG: Tai Chi (Yang-style)<br>(b) CG: normal life routine                                                                                | 10 weeks,<br>3 sessions/week,<br>20 min/session | FES-I                         | 6              |
| [26]<br>2012,<br>Vietnam +<br>Germany      | Two-arm<br>RCT  | Community-dwelling<br>adults aged 60 and<br>above,<br>$n = 73$ ,<br>$69.0 \pm 5.1$ years      | IG<br>$n = 39$ ,<br>$69.2 \pm 5.3$ years<br>CG<br>$n = 34$ ,<br>$68.7 \pm 5.0$ years | (a) IG: Tai Chi (24-form exercise; ba-<br>lance, postural alignment, concentra-<br>tion)<br>(b) CG: routine of daily activities            | 6 months,<br>2 sessions/week,<br>60 min/session | PSQI<br>FES                   | 5              |
| [27]<br>2016,<br>Iran                      | Two-arm<br>RCT  | Community-dwelling<br>adults aged between<br>60 and 74,<br>$n = 39$                           | IG<br>$n = 20$ ,<br>$68.0 \pm 4.9$ years<br>CG<br>$n = 19$ ,<br>$68.8 \pm 4.8$ years | (a) IG: Hatha Yoga (emphasis on <i>Pa-<br/>vanamuktasana</i> and balance move-<br>ments)<br>(b) CG: no treatment                           | 8 weeks,<br>2 sessions/week,<br>60 min/session  | MFES                          | 5              |

**Table S1 Continued**

| Reference:<br>Publication<br>Year, Country | Study<br>Design   | Sample:<br>Population,<br>Sample Size,<br>Mean Age $\pm$ SD                                        | Groups:<br>Sample Size,<br>Mean Age $\pm$ SD | Intervention                                               | Training<br>Characteristics                     | Target<br>Outcome<br>Measures   | PEDro<br>Score |
|--------------------------------------------|-------------------|----------------------------------------------------------------------------------------------------|----------------------------------------------|------------------------------------------------------------|-------------------------------------------------|---------------------------------|----------------|
| [28]<br>2017,<br>Australia +<br>Thailand   | Three-<br>arm RCT | Healthy, physically<br>inactive adults aged<br>60 and above,<br>$n = 39$ ,<br>$67.7 \pm 6.7$ years | TY<br>$n = 13$ ,<br>$67.7 \pm 4.9$ years     | (a) TY: Thai Yoga (15 postures)                            | 12 weeks,<br>2 sessions/week,<br>80 min/session | SF-36<br>CES-D                  | 8              |
|                                            |                   |                                                                                                    | TC<br>$n = 13$ ,<br>$67.2 \pm 8.3$ years     | (b) TC: Tai Chi (Sun Style; 12 move-<br>ments)             |                                                 |                                 |                |
|                                            |                   |                                                                                                    | CG<br>$n = 13$ ,<br>$65.2 \pm 6.7$ years     | (c) CG: telephone calls (information on<br>exercise)       |                                                 |                                 |                |
| [29]<br>2019,<br>Korea                     | Two-arm<br>RCT    | Community-dwelling<br>adults aged 65 and<br>above,<br>$n = 42$                                     | IG<br>$n = 20$ ,<br>$71.6 \pm 6.0$ years     | (a) IG: Tai Chi (24 forms of Yang-style)                   | 6 weeks,<br>5 sessions/week,<br>60 min/session  | SWLS<br>PEBS                    | 6              |
|                                            |                   |                                                                                                    | CG<br>$n = 22$ ,<br>$70.6 \pm 7.0$ years     | (b) CG: no treatment                                       |                                                 |                                 |                |
| [30]<br>2006,<br>USA                       | Three-<br>arm RCT | Inactive, community-<br>dwelling adults aged<br>65 and above,<br>$n = 118$                         | IG<br>$n = 38$ ,<br>$71.5 \pm 4.9$ years     | (a) IG: Iyengar Yoga                                       | 6 weeks,<br>1 session/week,<br>90 min/session   | SF-36<br>MFI<br>CESD-10<br>POMS | 6              |
|                                            |                   |                                                                                                    | CG<br>$n = 42$ ,<br>$73.6 \pm 5.1$ years     | (b) CG: wait-list control group                            |                                                 |                                 |                |
|                                            |                   |                                                                                                    | AE<br>$n = 38$ ,<br>$71.2 \pm 4.4$ years     | (c) AE: aerobic exercise, not included<br>in meta-analysis |                                                 |                                 |                |

**Table S1 Continued**

| Reference: Publication Year, Country      | Study Design   | Sample: Population, Sample Size, Mean Age $\pm$ SD                                                       | Groups: Sample Size, Mean Age $\pm$ SD                                                                                           | Intervention                                                                                                                                                                                                                              | Training Characteristics                                                                            | Target Outcome Measures | PEDro Score |
|-------------------------------------------|----------------|----------------------------------------------------------------------------------------------------------|----------------------------------------------------------------------------------------------------------------------------------|-------------------------------------------------------------------------------------------------------------------------------------------------------------------------------------------------------------------------------------------|-----------------------------------------------------------------------------------------------------|-------------------------|-------------|
| [31]<br>2018,<br>UK + Iran +<br>Norway    | Two-arm<br>RCT | Healthy, inactive men aged 60 and above living in a retirement home, $n = 132$ , $67.5 \pm 0.3$ years    | IG<br>$n = 66$ ,<br>$67.9 \pm 4.4$ years<br>CG<br>$n = 66$ ,<br>$67.0 \pm 3.6$ years                                             | (a) IG: Tai Chi (Yang-style; 10 movements extracted from 24 simple forms of Tai Chi Chuan)<br>(b) CG: no treatment                                                                                                                        | 8 weeks,<br>3 sessions/week,<br>30-40 min/session<br>(progressive duration)                         | LEIPAD                  | 8           |
| [32]<br>2016,<br>Germany +<br>Switzerland | Three-arm RCT  | Adults with chronic low back pain aged 65 and above (community-dwelling and retirement homes), $n = 176$ | YG<br>$n = 61$ ,<br>$73.0 \pm 5.6$ years<br>QG<br>$n = 58$ ,<br>$72.4 \pm 5.7$ years<br>CG<br>$n = 57$ ,<br>$72.6 \pm 6.0$ years | (a) YG: Viniyoga method; physical, breathing and concentration exercises while sitting, standing and lying<br>(b) QG: Dantian and Nei Yang Gong (Qigong) exercises from the Training System Liu Ya Fei<br>(c) CG: wait-list control group | 3 months,<br>YG:<br>2 sessions/week,<br>45 min/session,<br>QG:<br>1 session/week,<br>90 min/session | SF-36<br>GDS            | 7           |
| [33]<br>2017,<br>UK                       | Two-arm<br>RCT | Physically inactive adults aged 60 and above, $n = 52$ , $74.8 \pm 7.2$ years                            | IG<br>$n = 25$ ,<br>$73.8 \pm 6.5$ years<br>CG<br>$n = 27$ ,<br>$75.7 \pm 7.9$ years                                             | (a) IG: Yoga ( <i>asana</i> and <i>pranayama</i> ; postural advice, breath work, concentration)<br>(b) CG: wait-list control group                                                                                                        | 10 weeks,<br>1 session/week,<br>75 min/session                                                      | EQ-5D-5L<br>WEMWBS      | 7           |
| [34]<br>2013,<br>Australia                | Two-arm<br>RCT | Community-dwelling adults aged 59 and above, $n = 54$ , $68.0 \pm 7.1$ years                             | IG<br>$n = 27$ ,<br>$67.7 \pm 7.2$ years<br>CG<br>$n = 27$ ,<br>$67.3 \pm 6.1$ years                                             | (a) IG: Iyengar Yoga<br>(b) CG: no treatment                                                                                                                                                                                              | 12 weeks,<br>2 sessions/week,<br>60 min/session                                                     | Short FES-I             | 8           |

**Table S1 Continued**

| Reference: Publication Year, Country | Study Design  | Sample: Population, Sample Size, Mean Age $\pm$ SD                                    | Groups: Sample Size, Mean Age $\pm$ SD                                                                                             | Intervention                                                                                                                              | Training Characteristics                        | Target Outcome Measures | PEDro Score |
|--------------------------------------|---------------|---------------------------------------------------------------------------------------|------------------------------------------------------------------------------------------------------------------------------------|-------------------------------------------------------------------------------------------------------------------------------------------|-------------------------------------------------|-------------------------|-------------|
| [35]<br>2013,<br>China               | Two-arm RCT   | Frail adults aged 60 and above,<br>$n = 116$                                          | IG<br>$n = 61$ ,<br>$83.3 \pm 6.3$ years<br>CG<br>$n = 55$ ,<br>$84.9 \pm 6.0$ years                                               | (a) IG: Qigong (Yan Chai Yi Ji; ten-section brocade for standing and sitting positions)<br>(b) CG: newspaper reading group                | 12 weeks,<br>2 sessions/week,<br>60 min/session | GDS                     | 5           |
| [36]<br>2010,<br>USA                 | Two-arm RCT   | Community-dwelling adults aged 60 and above,<br>$n = 17$                              | IG<br>$n = 7$ ,<br>$75.5 \pm 9.2$ years<br>CG<br>$n = 10$ ,<br>$74.5 \pm 8.1$ years                                                | (a) IG: Yoga<br>(b) CG: socialization group                                                                                               | 4 weeks,<br>2 sessions/week,<br>60 min/session  | UCLA<br>CES-D           | 5           |
| [37]<br>2016,<br>China               | Three-arm RCT | Community-dwelling non-fallers at risk of falling aged between 65 and 74,<br>$n = 61$ | TC<br>$n = 20$ ,<br>$68.8 \pm 3.0$ years<br>CG<br>$n = 21$ ,<br>$69.9 \pm 3.3$ years<br>ExBP<br>$n = 20$ ,<br>$70.2 \pm 3.9$ years | (a) TC: Tai Chi (Yang-style)<br>(b) CG: no treatment<br>(c) ExBP: Exercise for Balance improvement program, not included in meta-analysis | 16 weeks,<br>3 sessions/week,<br>90 min/session | FES-I                   | 8           |

*Notes.* n: sample size; SD: standard deviation; IG: intervention group; CG: control group; PEDro: Physiotherapy Evidence Database scale; ABC: Activities-Specific Balance Confidence Scale; BDI: Beck Depression Inventory; BDI-II: Beck Depression Inventory-II; CES-D: Center for Epidemiological Studies Depression Scale; DASS21: Depression Anxiety Stress Scale-21; DJGLS: De Jong Gierveld Loneliness Scale; EQ-5D-5L: EuroQoL 5-dimension 5-level; (Short) FES: (Short) Falls Efficacy Scale; FES-I: Falls Efficacy Scale-International; GDS: Geriatric Depression Scale; GDS-SF: Geriatric Depression Scale-Short Form; GFFM: Geriatric Fear of Falling Measure; HADS: Hospital Anxiety and Depression Scale; ISSB: Inventory of Social Supportive Behaviors; LEIPAD: Leiden-Padua questionnaire; LSNS-6: Lubben Social Network Scale-6; MFES: Modified Falls Efficacy Scale; MFI: Multidimensional Fatigue Inventory; MHI-18: Mental Health Inventory-18; MSPSS: Multidimensional Scale of Perceived Social Support; NHP: Nottingham Health Profile; PEBS: Perceived Self-Efficacy Scale; POMS: Profile of Mood States; POMS-SF: Profile of Mood States-Short Form; PSQI: Pittsburgh Sleep Quality Index; RSES: Rosenberg Self-Esteem Scale; RSSQ: Revised Social Support Questionnaire; SF-36: 36-Item Short Form Health Survey; SF-12: 12-Item Short Form Health Survey; SF-20: 20-Item Short Form Health Survey; SGQR: St. George's Respiratory Questionnaire; SWLS: Satisfaction with Life Scale; TDQ: Taiwanese Depression Questionnaire; UCLA: University of California, Los Angeles, Loneliness Scale; WEMWBS: Warwick-Edinburgh Mental Well-being Scale; WHOQOL-BREF: World Health Organization Quality of Life Brief Version.

**Table S2** Questionnaires and corresponding outcomes of the included studies.

| Name<br>(Abbreviation, Reference)                 | Items   | Dimension/Subscales                                                                                                                                                                                     | Interpretation                                                                                  |
|---------------------------------------------------|---------|---------------------------------------------------------------------------------------------------------------------------------------------------------------------------------------------------------|-------------------------------------------------------------------------------------------------|
| <b>Overall Quality of life (QoL)</b>              |         |                                                                                                                                                                                                         |                                                                                                 |
| EuroQol 5-dimension 5-level<br>(EQ-5D-5L)<br>[38] | 5 + VAS | QoL<br><i>mobility</i><br><i>self-care</i><br><i>usual activities</i><br><i>pain/discomfort</i><br><i>anxiety/depression</i><br><i>visual analogue scale (VAS)</i>                                      | Total score: 0–1 (index value)<br>Total score: 0–100 (VAS)<br>Higher scores indicate better QoL |
| Leiden-Padua questionnaire<br>(LEIPAD)<br>[39]    | 31      | QoL<br><i>physical functioning</i><br><i>self-care</i><br><i>depression and anxiety</i><br><i>mental functioning</i><br><i>social functioning</i><br><i>sexual function</i><br><i>life satisfaction</i> | Total score: 0–93<br>Higher scores indicate better QoL                                          |
| Nottingham Health Profile<br>(NHP)<br>[40]        | 38      | QoL<br><i>sleep</i><br><i>physical activity/mobility</i><br><i>pain</i><br><i>energy</i><br><i>emotional reactions</i><br><i>social isolation</i>                                                       | Total score: 0–100<br>Higher scores indicate poorer level of health                             |
| Satisfaction With Life Scale<br>(SWLS)<br>[41]    | 5       | Life satisfaction                                                                                                                                                                                       | Total score: 5–35<br>Higher scores indicate better QoL                                          |

**Table S2 Continued**

| <b>Name<br/>(Abbreviation, Reference)</b>                                           | <b>Items</b> | <b>Dimension/Subscales</b>                                                                                                                                                                                 | <b>Interpretation</b>                                                  |
|-------------------------------------------------------------------------------------|--------------|------------------------------------------------------------------------------------------------------------------------------------------------------------------------------------------------------------|------------------------------------------------------------------------|
| Short Form Health Survey<br>(SF36/20/12)<br>[42]                                    | 36//20/12    | QoL<br><i>physical functioning</i><br><i>role physical</i><br><i>bodily pain</i><br><i>general health</i><br><i>mental health</i><br><i>role emotional</i><br><i>vitality</i><br><i>social functioning</i> | Total score: 0–100<br>Higher scores indicate better QoL                |
| St. George's Respiratory<br>Questionnaire<br>(SGRQ)<br>[43]                         | 50           | QoL (patients with diseases of airways obstruction)<br><i>symptoms</i><br><i>activity</i><br><i>impact</i>                                                                                                 | Total score: 0–100<br>Higher scores indicate more limitations          |
| World Health Organization<br>Quality of Life Brief Version<br>(WHOQOL-BREF)<br>[44] | 26           | QoL<br><i>physical health</i><br><i>psychological health</i><br><i>social relationships</i><br><i>environment</i>                                                                                          | Total score: 16–80<br>Higher scores indicate better QoL                |
| <b>Physical and psychological functioning (QoL)</b>                                 |              |                                                                                                                                                                                                            |                                                                        |
| Multidimensional Fatigue<br>Inventory<br>(MFI)<br>[45]                              | 20           | Fatigue<br><i>physical fatigue</i><br><i>reduced activity</i><br><i>mental fatigue</i><br><i>reduced motivation</i><br><i>general fatigue</i>                                                              | Total score: 20–140<br>Higher scores indicate higher degree of fatigue |

**Table S2 Continued**

| Name<br>(Abbreviation, Reference)                                | Items | Dimension/Subscales                                                                                                                    | Interpretation                                                                |
|------------------------------------------------------------------|-------|----------------------------------------------------------------------------------------------------------------------------------------|-------------------------------------------------------------------------------|
| <b>Psychological functioning (QoL)</b>                           |       |                                                                                                                                        |                                                                               |
| Mental Health Inventory<br>(MHI-18)<br>[46]                      | 18    | Mental health<br><i>anxiety</i><br><i>depression</i><br><i>behavioral control</i><br><i>positive affect</i><br><i>general distress</i> | Total score: 0–100<br>Higher scores indicate better mental health             |
| Perceived Self-Efficacy Scale<br>(PEBS)<br>[47]                  | 10    | Self-efficacy                                                                                                                          | Total score: 5–50<br>Higher scores indicate higher self-efficacy              |
| Rosenberg Self-Esteem Scale<br>(RSES)<br>[48]                    | 10    | Self-esteem                                                                                                                            | Total score: 10–40<br>Higher scores indicate higher self-esteem               |
| Warwick-Edinburgh Mental<br>Well-Being Scale<br>(WEMWBS)<br>[49] | 14    | Mental well-being                                                                                                                      | Total score: 14–70<br>Higher scores indicate higher mental well-being         |
| <b>Social functioning (QoL)</b>                                  |       |                                                                                                                                        |                                                                               |
| De Jong Gierveld Loneliness<br>Scale<br>(DJGLS)<br>[50]          | 11    | Feelings of loneliness<br><i>social loneliness</i><br><i>emotional loneliness</i>                                                      | Total score: 0–11<br>Higher scores indicate greater loneliness                |
| Inventory of Social Supportive<br>Behaviors<br>(ISSB)<br>[51]    | 13    | Supportive behaviors<br><i>behavior</i><br><i>satisfaction</i>                                                                         | Total score: 13–65<br>Higher scores indicate better behavior and satisfaction |

**Table S2 Continued**

| <b>Name<br/>(Abbreviation, Reference)</b>                                      | <b>Items</b> | <b>Dimension/Subscales</b> | <b>Interpretation</b>                                                       |
|--------------------------------------------------------------------------------|--------------|----------------------------|-----------------------------------------------------------------------------|
| Lubben Social Network Scale<br>(LSNS-6)<br>[52]                                | 6            | Social network             | Total score: 0–30<br>Higher scores indicate larger social networks          |
| Multidimensional Scale of<br>Perceived Social Support<br>(MSPSS)<br>[53]       | 12           | Perceived social support   | Total score: 12–84<br>Higher levels of perceived support                    |
| Revised Social Support<br>Questionnaire<br>(RSSQ)<br>[54]                      | 6            | Social support             | Total score: 6–36<br>Higher scores indicate larger social networks          |
| University of California,<br>Los Angeles, Loneliness Scale<br>(UCLA)<br>[55]   | 20           | Social isolation           | Total score: 0–93<br>Higher scores indicate higher level of loneli-<br>ness |
| <b>Depressive symptoms</b>                                                     |              |                            |                                                                             |
| Beck Depression Inventory<br>(2 <sup>nd</sup> version)<br>(BDI/BDI-II)<br>[56] | 21           | Depression                 | Total score: 0–63<br>Higher scores indicate greater depressive<br>symptoms  |
| Center for Epidemiological Stud-<br>ies Depression Scale<br>(CES-D)<br>[57]    | 20           | Depression                 | Total score: 0–60<br>Higher scores indicate greater depressive<br>symptoms  |



**Table S2 Continued**

| <b>Name<br/>(Abbreviation, Reference)</b>                              | <b>Items</b> | <b>Dimension/Subscales</b>                                                                                                                                                         | <b>Interpretation</b>                                                                                                   |
|------------------------------------------------------------------------|--------------|------------------------------------------------------------------------------------------------------------------------------------------------------------------------------------|-------------------------------------------------------------------------------------------------------------------------|
| Depression Anxiety Stress Scale<br>(short version)<br>(DASS21)<br>[58] | 21           | Depression<br>Anxiety<br>Stress                                                                                                                                                    | Total score: 0–42 (3x)<br>Higher scores indicate more psychological distress                                            |
| Geriatric Depression Scale<br>(Short Form)<br>(GSD/GDS-SF)<br>[59]     | 30/15        | Depression                                                                                                                                                                         | Total score: 0–15/30<br>Higher scores indicate greater depressive symptoms                                              |
| Hospital Anxiety and Depression<br>Scale<br>(HADS)<br>[60]             | 14           | Depression<br>Anxiety                                                                                                                                                              | Total score: 0–21<br>Higher scores indicate greater depressive symptoms                                                 |
| Profile of Mood States<br>(Short Form)<br>(POMS/POMS-SF)<br>[61]       | 65/35        | Mood states<br><i>tension-anxiety</i><br><i>depression-dejection</i><br><i>anger-hostility</i><br><i>vigor-activity</i><br><i>fatigue-inertia</i><br><i>confusion-bewilderment</i> | Higher scores in vigor indicate good mood or emotion, lower scores in the other subscales indicate good mood or emotion |
| Taiwanese Depression<br>Questionnaire<br>(TDQ)<br>[62]                 | 18           | Depression                                                                                                                                                                         | Total score: 0–54<br>Higher scores indicate greater depressive symptoms                                                 |
| <b>Fear of falling (FoF)</b>                                           |              |                                                                                                                                                                                    |                                                                                                                         |
| Activities-Specific Balance<br>Confidence Scale<br>(ABC)<br>[63]       | 16           | Balance confidence                                                                                                                                                                 | Total score: 0–100<br>Higher scores indicate greater balance confidence                                                 |

**Table S2 Continued**

| Name<br>(Abbreviation, Reference)                                          | Items   | Dimension/Subscales                                                                                                                                                                                                           | Interpretation                                                       |
|----------------------------------------------------------------------------|---------|-------------------------------------------------------------------------------------------------------------------------------------------------------------------------------------------------------------------------------|----------------------------------------------------------------------|
| Falls Efficacy Scale<br>(International)<br>(FES/FES-I/Short FES-I)<br>[64] | 10/16/7 | FoF                                                                                                                                                                                                                           | Total score: 10–100/16–64/7–28<br>Higher scores indicate greater FoF |
| Modified Falls Efficacy Scale<br>(MFES)<br>[65]                            | 14      | FoF                                                                                                                                                                                                                           | Total score: 0–10<br>Higher scores indicate greater FoF              |
| Geriatric Fear of Falling Measure<br>(GFFM)<br>[66]                        | 15      | FoF<br><i>psychosomatic symptoms</i><br><i>risk prevention</i><br><i>modifying behavior</i>                                                                                                                                   | Total score: 0–15<br>Higher scores indicate greater FoF              |
| <b>Sleep quality</b>                                                       |         |                                                                                                                                                                                                                               |                                                                      |
| Pittsburgh Sleep Quality Index<br>(PSQI)<br>[67]                           | 19      | Sleep quality<br><i>subjective sleep quality</i><br><i>sleep latency</i><br><i>sleep duration</i><br><i>habitual sleep efficacy</i><br><i>sleep disturbances</i><br><i>sleeping medications</i><br><i>daytime dysfunction</i> | Total score: 0–21<br>Higher scores indicate worse sleep quality      |

**Table S3** PEDro scores and sum of the included trials.

| Reference | 1.<br>Eligibility<br>Specified | 2.<br>Subjects<br>Randomly<br>Allocated | 3.<br>Concealed<br>Allocation | 4.<br>Similar<br>Baseline<br>Values | 5.<br>Blinding<br>of<br>Subjects | 6.<br>Blinding<br>of<br>Therapist | 7.<br>Blinding<br>of<br>Assessor | 8.<br>Dropout<br><15% | 9.<br>Received<br>Treatment<br>as<br>Allocated | 10.<br>Statistical<br>Between-<br>Group<br>Compari-<br>son | 11.<br>Point<br>Measures<br>and Varia-<br>bility<br>Provided | Sum<br>(2–11) |
|-----------|--------------------------------|-----------------------------------------|-------------------------------|-------------------------------------|----------------------------------|-----------------------------------|----------------------------------|-----------------------|------------------------------------------------|------------------------------------------------------------|--------------------------------------------------------------|---------------|
| [1]       | +                              | +                                       | +                             | +                                   | –                                | –                                 | +                                | +                     | –                                              | +                                                          | +                                                            | 7             |
| [2]       | +                              | +                                       | +                             | +                                   | –                                | –                                 | +                                | +                     | +                                              | +                                                          | +                                                            | 8             |
| [3]       | +                              | +                                       | –                             | +                                   | –                                | –                                 | +                                | +                     | +                                              | +                                                          | +                                                            | 7             |
| [4]       | +                              | +                                       | –                             | +                                   | –                                | –                                 | +                                | –                     | +                                              | +                                                          | +                                                            | 6             |
| [5]       | +                              | +                                       | –                             | +                                   | –                                | –                                 | +                                | +                     | –                                              | +                                                          | +                                                            | 6             |
| [6]       | +                              | +                                       | –                             | +                                   | –                                | –                                 | –                                | +                     | –                                              | +                                                          | +                                                            | 5             |
| [7]       | +                              | +                                       | –                             | +                                   | –                                | –                                 | +                                | +                     | –                                              | +                                                          | +                                                            | 6             |
| [8]       | +                              | +                                       | –                             | +                                   | –                                | –                                 | –                                | +                     | –                                              | +                                                          | +                                                            | 5             |
| [9]       | +                              | +                                       | –                             | +                                   | –                                | –                                 | –                                | +                     | –                                              | +                                                          | +                                                            | 5             |
| [10]      | +                              | +                                       | –                             | +                                   | –                                | –                                 | –                                | +                     | +                                              | +                                                          | +                                                            | 6             |
| [11]      | +                              | +                                       | +                             | +                                   | –                                | –                                 | +                                | +                     | +                                              | +                                                          | +                                                            | 8             |
| [12]      | +                              | +                                       | +                             | +                                   | –                                | –                                 | +                                | +                     | –                                              | +                                                          | +                                                            | 7             |
| [13]      | +                              | +                                       | +                             | +                                   | –                                | –                                 | +                                | +                     | +                                              | +                                                          | +                                                            | 8             |

**Table S3** *Continued*

| Reference | 1.<br>Eligibility<br>Specified | 2.<br>Subjects<br>Randomly<br>Allocated | 3.<br>Concealed<br>Allocation | 4.<br>Similar<br>Baseline<br>Values | 5.<br>Blinding<br>of<br>Subjects | 6.<br>Blinding<br>of<br>Therapist | 7.<br>Blinding<br>of<br>Assessor | 8.<br>Dropout<br><15% | 9.<br>Received<br>Treatment<br>as<br>Allocated | 10.<br>Statistical<br>Between-<br>Group<br>Compari-<br>son | 11.<br>Point<br>Measures<br>and Varia-<br>bility<br>Provided | Sum<br>(2–11) |
|-----------|--------------------------------|-----------------------------------------|-------------------------------|-------------------------------------|----------------------------------|-----------------------------------|----------------------------------|-----------------------|------------------------------------------------|------------------------------------------------------------|--------------------------------------------------------------|---------------|
| [14]      | +                              | +                                       | –                             | +                                   | –                                | –                                 | +                                | +                     | –                                              | +                                                          | +                                                            | 6             |
| [15]      | –                              | +                                       | –                             | +                                   | –                                | –                                 | –                                | +                     | –                                              | +                                                          | +                                                            | 5             |
| [16]      | +                              | +                                       | –                             | +                                   | –                                | –                                 | +                                | +                     | +                                              | +                                                          | +                                                            | 7             |
| [17]      | +                              | +                                       | –                             | +                                   | –                                | –                                 | –                                | +                     | +                                              | +                                                          | +                                                            | 6             |
| [18]      | +                              | +                                       | –                             | +                                   | –                                | –                                 | –                                | +                     | +                                              | +                                                          | +                                                            | 6             |
| [19]      | +                              | +                                       | +                             | +                                   | –                                | –                                 | +                                | +                     | +                                              | +                                                          | +                                                            | 8             |
| [20]      | +                              | +                                       | +                             | +                                   | –                                | –                                 | –                                | +                     | +                                              | +                                                          | +                                                            | 7             |
| [21]      | +                              | +                                       | –                             | +                                   | –                                | –                                 | –                                | +                     | –                                              | +                                                          | +                                                            | 5             |
| [22]      | +                              | +                                       | –                             | +                                   | –                                | –                                 | +                                | –                     | +                                              | +                                                          | +                                                            | 6             |
| [23]      | +                              | +                                       | +                             | +                                   | –                                | –                                 | +                                | +                     | +                                              | +                                                          | +                                                            | 8             |
| [24]      | +                              | +                                       | –                             | +                                   | –                                | –                                 | +                                | +                     | +                                              | +                                                          | +                                                            | 7             |
| [25]      | +                              | +                                       | +                             | +                                   | –                                | –                                 | –                                | +                     | –                                              | +                                                          | +                                                            | 6             |
| [26]      | +                              | +                                       | –                             | +                                   | –                                | –                                 | –                                | +                     | –                                              | +                                                          | +                                                            | 5             |

**Table S3 Continued**

| Reference | 1.<br>Eligibility<br>Specified | 2.<br>Subjects<br>Randomly<br>Allocated | 3.<br>Concealed<br>Allocation | 4.<br>Similar<br>Baseline<br>Values | 5.<br>Blinding<br>of<br>Subjects | 6.<br>Blinding<br>of<br>Therapist | 7.<br>Blinding<br>of<br>Assessor | 8.<br>Dropout<br><15% | 9.<br>Received<br>Treatment<br>as<br>Allocated | 10.<br>Statistical<br>Between-<br>Group<br>Compari-<br>son | 11.<br>Point<br>Measures<br>and Varia-<br>bility<br>Provided | Sum<br>(2–11) |
|-----------|--------------------------------|-----------------------------------------|-------------------------------|-------------------------------------|----------------------------------|-----------------------------------|----------------------------------|-----------------------|------------------------------------------------|------------------------------------------------------------|--------------------------------------------------------------|---------------|
| [27]      | +                              | +                                       | –                             | +                                   | –                                | –                                 | –                                | +                     | –                                              | +                                                          | +                                                            | 5             |
| [28]      | +                              | +                                       | +                             | +                                   | –                                | –                                 | +                                | +                     | +                                              | +                                                          | +                                                            | 8             |
| [29]      | +                              | +                                       | +                             | +                                   | –                                | –                                 | –                                | +                     | –                                              | +                                                          | +                                                            | 6             |
| [30]      | +                              | +                                       | –                             | +                                   | –                                | –                                 | +                                | +                     | –                                              | +                                                          | +                                                            | 6             |
| [31]      | +                              | +                                       | +                             | +                                   | –                                | –                                 | +                                | +                     | +                                              | +                                                          | +                                                            | 8             |
| [32]      | +                              | +                                       | +                             | +                                   | –                                | –                                 | –                                | +                     | +                                              | +                                                          | +                                                            | 7             |
| [33]      | +                              | +                                       | –                             | +                                   | –                                | –                                 | +                                | +                     | +                                              | +                                                          | +                                                            | 7             |
| [34]      | +                              | +                                       | +                             | +                                   | –                                | –                                 | +                                | +                     | +                                              | +                                                          | +                                                            | 8             |
| [35]      | +                              | +                                       | –                             | +                                   | –                                | –                                 | –                                | +                     | –                                              | +                                                          | +                                                            | 5             |
| [36]      | +                              | +                                       | –                             | +                                   | –                                | –                                 | –                                | +                     | –                                              | +                                                          | +                                                            | 5             |
| [37]      | +                              | +                                       | +                             | +                                   | –                                | –                                 | +                                | +                     | +                                              | +                                                          | +                                                            | 8             |

Note. PEDro: Physiotherapy Evidence Database scale; +: yes; –: no.

## References

1. Aibar-Almazán, A.; Hita-Contreras, F.; Cruz-Díaz, D.; de la Torre-Cruz, M.; Jiménez-García, J.D.; Martínez-Amat, A. Effects of Pilates training on sleep quality, anxiety, depression and fatigue in postmenopausal women: A randomized controlled trial. *Maturitas* **2019**, *124*, 62–67, doi:10.1016/j.maturitas.2019.03.019.
2. Aibar-Almazán, A.; Martínez-Amat, A.; Cruz-Díaz, D.; De la Torre-Cruz, M.J.; Jiménez-García, J.D.; Zagalaz-Anula, N.; Pérez-Herrezuelo, I.; Hita-Contreras, F. Effects of Pilates on fall risk factors in community-dwelling elderly women: A randomized, controlled trial. *Eur. J. Sport Sci.* **2019**, *19*, 1386–1394, doi:10.1080/17461391.2019.1595739.
3. Alp, A.; Cansever, Ş.; Görgeç, N.; Yurtkuran, M.; Topsaç, T. Effects of Tai Chi exercise on functional and life quality assessments in senile osteoporosis. *Türkiye Klin. J. Med. Sci.* **2009**, *29*, 687–695.
4. Chan, A.W.K.; Lee, A.; Lee, D.T.F.; Sit, J.W.H.; Chair, S.Y. Evaluation of the sustaining effects of Tai Chi Qigong in the sixth month in promoting psychosocial health in COPD patients: A single-blind, randomized controlled trial. *Sci. World J.* **2013**, doi:10.1155/2013/425082.
5. Chan, A.W.K.; Yu, D.S.F.; Choi, K.C. Effects of Tai Chi qQgong on psychosocial well-being among hidden elderly, using elderly neighborhood volunteer approach: A pilot randomized controlled trial. *Clin. Interv. Aging* **2017**, *12*, 85–96, doi:10.2147/CIA.S124604.
6. Chen, K.M.; Chen, M.H.; Chao, H.C.; Hung, H.M.; Lin, H.S.; Li, C.H. Sleep quality, depression state, and health status of older adults after silver Yoga exercises: Cluster randomized trial. *Int. J. Nurs. Stud.* **2009**, *46*, 154–163, doi:10.1016/j.ijnurstu.2008.09.005.
7. Chyu, M.C.; James, C.R.; Sawyer, S.F.; Brismée, J.M.; Xu, K.T.; Poklikuha, G.; Dunn, D.M.; Shen, C.L. Effects of Tai Chi exercise on posturography, gait, physical function and quality of life in postmenopausal women with osteopaenia: A randomized clinical study. *Clin. Rehabil.* **2010**, *24*, 1080–1090, doi:10.1177/0269215510375902.
8. Dong, L.; Lee, J.-B.; Kim, Y.-K.; Kim, Y.-S. The effects of health Qigong training of elderly single women on pain consciousness and depression. *Int. J. Appl. Sport. Sci.* **2013**, *25*, 118–126, doi:10.24985/ijass.2013.25.2.118.
9. Fakhari, M. Effects of Tai Chi exercise on depression in older adults: A randomized controlled trial. *Bali Med. J.* **2017**, *6*, 679, doi:10.15562/bmj.v6i3.706.
10. Fan, B.; Song, W.; Zhang, J.; Er, Y.; Xie, B.; Zhang, H.; Liao, Y.; Wang, C.; Hu, X.; Mcintyre, R.; et al. The efficacy of mind-body (Baduanjin) exercise on self-reported sleep quality and quality of life in elderly subjects with sleep disturbances: A randomized controlled trial. *Sleep Breath.* **2020**, doi:10.1007/s11325-019-01999-w.
11. Fransen, M.; Nairn, L.; Winstanley, J.; Lam, P.; Edmonds, J. Physical activity for osteoarthritis management: A randomized controlled clinical trial evaluating hydrotherapy or Tai Chi classes. *Arthritis Care Res. (Hoboken)*. **2007**, *57*, 407–414, doi:10.1002/art.22621.
12. Gabizon, H.; Press, Y.; Volkov, I.; Melzer, I. The effects of Pilates training on balance control and self-reported health status in community-dwelling older adults: A randomized controlled trial. *J. Aging Phys. Act.* **2016**, *24*, 376–383, doi:10.1123/japa.2014-0298.
13. Greendale, G.A.; Huang, M.-H.; Karlamangla, A.S.; Seeger, L.; Crawford, S. Yoga decreases kyphosis in senior women and men with adult onset hyperkyphosis: Results of a randomized controlled trial. *J. Am. Geriatr. Soc.* **2009**, *57*, 1569–1579, doi:10.1111/j.1532-5415.2009.02391.x.
14. Groessl, E.J.; Maiya, M.; Schmalzl, L.; Wing, D.; Jeste, D. V. Yoga to prevent mobility limitations in older adults: Feasibility of a randomized controlled trial. *BMC Geriatr.* **2018**, *18*, doi:10.1186/s12877-018-0988-8.
15. Hosseini, H.; Esfirizi, M.F.; Marandi, S.M.; Rezaei, A. The effect of Tai Chi exercise on the sleep quality of the elderly residents in Isfahan, Sadeghieh elderly home. *Iran. J. Nurs. Midwifery Res.* **2011**, *16*, 55–60.
16. Hosseini, L.; Kargozar, E.; Sharifi, F.; Negarandeh, R.; Memari, A.H.; Navab, E. Tai Chi Chuan can improve balance and reduce fear of falling in community dwelling older adults: A randomized control trial. *J. Exerc. Rehabil.* **2018**, *14*, 1024–1031, doi:10.12965/jer.1836488.244.
17. Hsu, C.Y.; Moyle, W.; Cooke, M.; Jones, C. Seated Tai Chi versus usual activities in older people using wheelchairs: A randomized controlled trial. *Complement. Ther. Med.* **2016**, *24*, 1–6, doi:10.1016/j.ctim.2015.11.006.
18. Hsu, C.Y.; Moyle, W.; Cooke, M.; Jones, C. Seated T'ai Chi in older Taiwanese people using wheelchairs: A randomized controlled trial investigating mood states and self-efficacy. *J. Altern. Complement. Med.* **2016**, *22*, 990–996, doi:10.1089/acm.2015.0191.
19. Huang, T.T.; Yang, L.H.; Liu, C.Y. Reducing the fear of falling among community-dwelling elderly adults through cognitive-behavioural strategies and intense Tai Chi exercise: A randomized controlled trial. *J. Adv. Nurs.* **2011**, *67*, 961–971, doi:10.1111/j.1365-2648.2010.05553.x.

20. Irwin, M.R.; Olmstead, R.; Motivala, S.J. Improving sleep quality in older adults with moderate sleep complaints: A randomized controlled trial of Tai Chi Chih. *Sleep* **2008**, *31*, 1001–1008, doi:10.5665/sleep/31.7.1001.
21. Li, F.; Harmer, P.; McAuley, E.; John Fisher, K.; Duncan, T.E.; Duncan, S.C. Tai Chi, self-efficacy, and physical function in the elderly. *Prev. Sci.* **2001**, *2*, 229–239, doi:10.1023/A:1013614200329.
22. Lipsitz, L.A.; Macklin, E.A.; Trivison, T.G.; Manor, B.; Gagnon, P.; Tsai, T.; Aizpurua, I.I.; Lo, O.-Y.; Wayne, P.M. A cluster randomized trial of Tai Chi vs. health education in subsidized housing: The MI-WiSH study. *J. Am. Geriatr. Soc.* **2019**, *67*, 1812–1819, doi:10.1111/jgs.15986.
23. Logghe, I.H.J.; Zeeuwe, P.E.M.; Verhagen, A.P.; Wijnen-Sponselee, R.M.T.; Willemsen, S.P.; Bierma-Zeinstra, S.M.A.; van Rossum, E.; Faber, M.J.; Koes, B.W. Lack of effect of Tai Chi Chuan in preventing falls in elderly people living at home: A randomized clinical trial. *J. Am. Geriatr. Soc.* **2009**, *57*, 70–75, doi:10.1111/j.1532-5415.2008.02064.x.
24. Lü, J.; Huang, L.; Wu, X.; Fu, W.; Liu, Y. Effect of Tai Ji Quan training on self-reported sleep quality in elderly Chinese women with knee osteoarthritis: A randomized controlled trial. *Sleep Med.* **2017**, *33*, 70–75, doi:10.1016/j.sleep.2016.12.024.
25. Mortazavi, H.; Tabatabaei, M.; Golestani, A.; Armat, M.; Yousefi, M. The effect of Tai Chi exercise on the risk and fear of falling in older adults: A randomized clinical trial. *Mater. Socio Medica* **2018**, *30*, 38, doi:10.5455/msm.2018.30.38-42.
26. Nguyen, M.H.; Kruse, A. A randomized controlled trial of Tai chi for balance, sleep quality and cognitive performance in elderly Vietnamese. *Clin. Interv. Aging* **2012**, *7*, 185–189, doi:10.2147/CIA.S32600.
27. Nick, N.; Petramfar, P.; Ghodsbini, F.; Keshavarzi, S.; Jahanbin, I. The effect of Yoga on balance and fear of falling in older adults. *PM R* **2016**, *8*, 145–151, doi:10.1016/j.pmrj.2015.06.442.
28. Noradechanunt, C.; Worsley, A.; Groeller, H. Thai Yoga improves physical function and well-being in older adults: A randomised controlled trial. *J. Sci. Med. Sport* **2017**, *20*, 494–501, doi:10.1016/j.jsams.2016.10.007.
29. Oh, C.; Kang, H. Effects of Tai Chi exercise on the body composition, self-efficacy and life satisfaction of older adults in Korean local community. *Int. J. Gerontol.* **2019**, *13*, 134–138, doi:10.6890/IJGE.201906\_13(2).0007.
30. Oken, B.S.; Zajdel, D.; Kishiyama, S.; Flegal, K.; Dehen, C.; Haas, M.; Kraemer, D.F.; Lawrence, J.; Leyva, J. Randomized, controlled, six-month trial of Yoga in healthy seniors: Effects on cognition and quality of life. *Altern. Ther. Health Med.* **2006**, *12*, 40–47.
31. Tajik, A.; Rejeh, N.; Heravi-Karimooi, M.; Kia, P.S.; Tadrissi, S.D.; Watts, T.E.; Griffiths, P.; Vaismoradi, M. The effect of Tai Chi on quality of life in male older people: A randomized controlled clinical trial. *Complement. Ther. Clin. Pract.* **2018**, *33*, 191–196, doi:10.1016/j.ctcp.2018.10.009.
32. Teut, M.; Knilli, J.; Daus, D.; Roll, S.; Witt, C.M. Qigong or Yoga versus no intervention in older adults with chronic low back pain—A randomized controlled trial. *J. Pain* **2016**, *17*, 796–805, doi:10.1016/j.jpain.2016.03.003.
33. Tew, G.A.; Howsam, J.; Hardy, M.; Bissell, L. Adapted yoga to improve physical function and health-related quality of life in physically-inactive older adults: a randomised controlled pilot trial. *BMC Geriatr.* **2017**, *17*, doi:10.1186/s12877-017-0520-6.
34. Tiedemann, A.; O'Rourke, S.; Sesto, R.; Sherrington, C. A 12-week Iyengar Yoga program improved balance and mobility in older community-dwelling people: A pilot randomized controlled trial. *J. Gerontol. Ser. A Biol. Sci. Med. Sci.* **2013**, *68*, 1068–1075, doi:10.1093/gerona/glt087.
35. Tsang, H.W.H.; Lee, J.L.C.; Au, D.W.H.; Wong, K.K.W.; Lai, K.W. Developing and testing the effectiveness of a novel health qigong for frail elders in Hong Kong: A preliminary study. *Evid. based Complement. Altern. Med.* **2013**, *2013*, 827392, doi:10.1155/2013/827392.
36. Wang, D.S. Feasibility of a Yoga intervention for enhancing the mental well-being and physical functioning of older adults living in the community. *Act. Adapt. Aging* **2010**, *34*, 85–97, doi:10.1080/01924781003773559.
37. Zhao, Y.; Chung, P.K.; Tong, T.K. Effectiveness of a community-based exercise program on balance performance and fear of falling in older nonfallers at risk for falling: A randomized, controlled study. *J. Aging Phys. Act.* **2016**, *24*, 516–524, doi:10.1123/japa.2015-0224.
38. Herdman, M.; Gudex, C.; Lloyd, A.; Janssen, M.; Kind, P.; Parkin, D.; Bonnel, G.; Badia, X. Development and preliminary testing of the new five-level version of EQ-5D (EQ-5D-5L). *Qual. Life Res.* **2011**, *20*, 1727–1736, doi:10.1007/s11136-011-9903-x.
39. De Leo, D.; Diekstra, R.F.W.; Lonnqvist, J.; Lonnqvist, J.; Cleiren, M.H.P.D.; Frisoni, G.B.; Buono, M. Dello; Haltunen, A.; Zucchetto, M.; Rozzini, R.; et al. Leipad, an internationally applicable instrument to assess quality of life in the elderly. *Behav. Med.* **1998**, *24*, 17–27, doi:10.1080/08964289809596377.

40. Hunt, S.M.; McEwen, J.; McKenna, S.P. Measuring health status: A new tool for clinicians and epidemiologists. *J. R. Coll. Gen. Pract.* **1985**, *35*, 185–188.
41. Diener, E.; Emmons, R.A.; Larsen, R.J.; Griffin, S. The satisfaction with life scale. *J. Pers. Assess.* **1985**, *49*, 71–75, doi:10.1207/s15327752jpa4901\_13.
42. Ware, J.E.; Sherbourne, C.D. The MOS 36-item short-form health survey (SF-36). *Med. Care* **1992**, *30*, 473–483, doi:10.1097/00005650-199206000-00002.
43. Jones, P.W.; Quirk, F.H.; Baveystock, C.M. The St. George's respiratory questionnaire. *Respir. Med.* **1991**, *85*, 25–31, doi:10.1016/S0954-6111(06)80166-6.
44. Skevington, S.M.; Lotfy, M.; O'Connell, K.A. The World Health Organization's WHOQOL-BREF quality of life assessment: Psychometric properties and results of the international field trial a report from the WHOQOL Group. *Qual. Life Res.* **2004**, *13*, 299–310, doi: 10.1023/B:QURE.0000018486.91360.00.
45. Smets, E.M.A.; Garssen, B.; Bonke, B.; de Haes, J. The multidimensional fatigue inventory (MFI) psychometric qualities of an instrument to assess fatigue. *J. Psychosom. Res.* **1995**, *39*, 315–325, doi:10.1016/0022-3999(94)00125-O.
46. Veit, C.T.; Ware, J.E. The structure of psychological distress and well-being in general populations. *J. Consult. Clin. Psychol.* **1983**, *51*, 730–742, doi:10.1037/0022-006X.51.5.730.
47. Riggs, M.L.; Knight, P.A. The impact of perceived group success-failure on motivational beliefs and attitudes: A causal model. *J. Appl. Psychol.* **1994**, *79*, 755–766, doi:10.1037/0021-9010.79.5.755.
48. Rosenberg, M. Self esteem and the adolescent self-image. *Science.* **1965**, *148*, 804, doi:10.1126/science.148.3671.804.
49. Tennant, R.; Hiller, L.; Fishwick, R.; Platt, S.; Joseph, S.; Weich, S.; Parkinson, J.; Secker, J.; Stewart-Brown, S. The Warwick-Dinburgh mental well-being scale (WEMWBS): Development and UK validation. *Health Qual. Life Outcomes* **2007**, *5*, 63, doi:10.1186/1477-7525-5-63.
50. Gierveld, J.D.J.; Van Tilburg, T. A 6-item scale for overall, emotional, and social loneliness: Confirmatory tests on survey data. *Res. Aging* **2006**, *28*, 582–598, doi:10.1177/0164027506289723.
51. Barrera, M.; Sandler, I.N.; Ramsay, T.B. Preliminary development of a scale of social support: Studies on college students. *Am. J. Community Psychol.* **1981**, *9*, 435–447, doi:10.1007/BF00918174.
52. Lubben, J.E. Assessing social networks among elderly populations. *Fam. Community Heal. J. Heal. Promot. Maint.* **1988**, *11*, 42–52, doi:10.1097/00003727-198811000-00008.
53. Zimet, G.D.; Dahlem, N.W.; Zimet, S.G.; Gordon, K.; Farley, G.K. The multidimensional scale of perceived social support. *J. Pers. Assess.* **1988**, *52*, 30–41, doi:10.1207/s15327752jpa5201\_2.
54. Sarason, I.G.; Sarason, B.R.; Shearin, E.N.; Pierce, G.R. A brief measure of social support: Practical and theoretical implications. *J. Soc. Pers. Relat.* **1987**, *4*, 497–510, doi:10.1177/0265407587044007.
55. Hughes, M.E.; Waite, L.J.; Hawkey, L.C.; Cacioppo, J.T. A short scale for measuring loneliness in large surveys: Results from two population-based studies. *Res. Aging* **2004**, *26*, 655–672, doi:10.1177/0164027504268574.
56. Beck, A.; Ward, C.; Mendelson, H.; Mock, M.; Erbaugh, J. An inventory for measuring depression. *Arch. Gen. Psychiatry* **1961**, *4*, 561–571, doi:10.1001/archpsyc.1961.01710120031004.
57. Andresen, E.M.; Malmgren, J.A.; Carter, W.B.; Patrick, D.L. Screening for depression in well older adults: Evaluation of a short form of the CES-D. *Am. J. Prev. Med.* **1994**, *10*, 77–84, doi:10.1016/s0749-3797(18)30622-6.
58. Lovibond, P.F.; Lovibond, S.H. The structure of negative emotional states: Comparison of the depression anxiety stress scales (DASS) with the beck depression and anxiety inventories. *Behav. Res. Ther.* **1995**, *33*, 335–343, doi:10.1016/0005-7967(94)00075-U.
59. Yesavage, J.A.; Brink, T.L.; Rose, T.L.; Lum, O.; Huang, V.; Adey, M.; Leirer, V.O. Development and validation of a geriatric depression screening scale: A preliminary report. *J. Psychiatr. Res.* **1982**, *17*, 37–49, doi:10.1016/0022-3956(82)90033-4.
60. Zigmond, A.S.; Snaith, R.P. The hospital anxiety and depression scale. *Acta Psychiatr. Scand.* **1983**, *67*, 361–370, doi:10.1093/occmed/kqu024.
61. McNair, D.M.; Lorr, M. An analysis of mood in neurotics. *J. Abnorm. Soc. Psychol.* **1964**, *69*, 620–627, doi:10.1037/h0040902.
62. Lee, Y.; Yang, M.J.; Lai, T.J.; Chiu, N.M.; Chau, T.T. Development of the Taiwanese depression questionnaire. *Chang Gung Med. J.* **2000**, *23*, 688–694.
63. Powell, L.; Myers, A. The Activities-specific Balance Confidence ( ABC ) Scale. *J. Gerontol.* **1995**, *50A*, 28–34, doi: 10.1093/gerona/50a.1.m28.



64. Kempen, G.; Yardley, L.; van Haastregt, J.; Zijlstra, G.; Beyer, N.; Hauer, K.; Todd, C. The short FES-I: a shortened version of the falls efficacy scale-international to assess fear of falling. *Age Ageing* **2008**, *37*, 45–50, doi:10.1093/ageing/afm157.
65. Tinetti, M.E.; Richman, D.; Powell, L. Falls efficacy as a measure of fear of falling. *J. Gerontol.* **1990**, *45*, 239–243, doi:10.1093/geronj/45.6.P239.
66. Huang, T.T. Geriatric fear of falling measure: Development and psychometric testing. *Int. J. Nurs. Stud.* **2006**, *43*, 357–365, doi:10.1016/j.ijnurstu.2005.04.006.
67. Buysse, D.J.; Reynolds, C.F.; Monk, T.H.; Berman, S.R.; Kupfer, D.J. The Pittsburgh sleep quality index: A new instrument for psychiatric practice and research. *Psychiatry Res.* **1989**, *28*, 193–213, doi:10.1016/0165-1781(89)90047-4.
